# Supplementary material
Source: publisher figshare collection journal article supplement (https://acs.figshare.com/ndownloader/files/27368500)
Supplement: Supplementary file 1 [file 27368500]

## Sheet: 167 accessions
Association between markers and eleven vitamin contents in grains of a worldwide bread wheat core collection
Supporting information 10 file1. List of the 167 accessions used in this study selected from the 372 accessions core-collection
Accession
Code	Name	Origin
7	(95-13*BEZOSTAIA)3-3	FRA
19	CH01193	CHE
177	DI15	FRA
234	DI182-9	FRA
338	DI276	FRA
347	2838-39	BGR
386	DI330	FRA
419	DI37-12-2	FRA
421	3716-1	BGR
477	DI50-12	FRA
524	60293	NLD
546	664-258-18	BGR
748	A4	AFG
794	ADMONTER	AUT
797	ADULAR	DEU
833	AKADARUMA	JPN
871	ALMA	FRA
957	ARAWA	AUS-NZL
964	ARCHE-FRA	FRA
1192	BALKAN	YUG-HRV
1232	BARBU DU FINISTERE	FRA
1236	BARBU DU TRONCHET	FRA
1281	BEL ET BON	FRA
1288	BELLIEI 590	HUN
1321	BENNI	USA
1332	BERZATACA	FIN
1357	BIITTA	SWE
1402	BLASON	FRA
1417	BLE D'OR	FRA
1429	BLE DE HAIE	FRA
1498	BLE DU ROUSSILLON	FRA
1529	BLONDYNKA	POL
1531	Blueboy	USA
1747	114/62	AUT
1768	CANDEAL DE AREVALO	ESP
1885	CENAD 512	ROM
1899	CEREALOR	FRA
1957	CF3003-2-7-4-4-3	FRA
1974	CF4563-1-5-3-2-5	FRA
2025	CH73052	CHE
2145	CHITLANG	NPL
2153	CHORTANDINKA	Central-Asia
2169	CHYAKSILA EPI NON VELU	NPL
2308	Compton	USA
2345	CORSODOR	FRA
2364	CP4	FRA
2399	D130-63	POL
2424	Danubia	CZE
2438	DAVIDOC	FRA
2475	DETENICKA CERVENA	CZE
2489	DI6402-34-2-4	FRA
2491	DI6404-19-15	FRA
2507	DI7003-1-12	FRA
2508	DI7005-113-3	FRA
2526	DI7202-103	FRA
2534	DI7210-15-11	FRA
2536	DI7215-100	FRA
2573	DIANA	POL
2574	DIANA II	CZE
2606	DNEPROVSKAIA	UKR
2626	DONG-FANG-HONG-NO3	CHN
2644	DRAGON-FRA	FRA
2650	DRAVA	YUG-HRV
2683	E108	FRA
2698	EBRO	ESP
2802	ESPOIR	FRA
2991	FERRUGINEUM	RUS
3278	GELPA	FRA
3299	GH126	FRA
3342	GK SZOKE	HUN
3366	GODOLLOI 15	HUN
3406	GRANIT	RUS
3414	GRENIER	FRA
3485	H93-70	ESP
3617	HIVERNAL	FRA
3753	IAS 1	BRA
3896	JANGO	FRA
3912	JASZsAgI TF	HUN
3970	JUFY II	BEL
3991	K1898-9/L200-6	BGR
4036	KATYIL	AUS-NZL
4105	KID	FRA
4111	KIRAC 66	TUR
4157	KOLBEN 3	SWE
4187	KRAKA	NOR-DNK
4194	KRELOF 3	FRA
4300	LESZYNSKA WCZESNA	POL
4324	LITTLE CLUB	USA
4343	LONTOI	FIN
4525	MALGORZATKA UDYCKA	POL
4664	MASTER	GBR-IRL
4670	MATRADERECSKEITF	HUN
4838	MINTURK	USA
4947	MOTTIN	FRA
4991	MV MA	HUN
5293	NOUGAT	FRA
5401	NZ(81)P43	AUS-NZL
5421	ODESSA EXPSTA20722	PRT
5438	ODESSKAIA 16	UKR
5448	OGOSTA	BGR
5536	OULIANOWSKA	RUS
5552	P, DE BROLLON	ESP
5558	P4523-80	AUT
5773	POILU DU TARN	FRA
6308	ROUGE-D'ALTKIRCH	FRA
6318	ROUGE DE MARCHISSY	CHE
6529	SEU SEUN 27	CHN
6740	STUBES DICKKOPF	DEU
6922	TF6	FRA
6986	TOM THUMB	USA
7011	TOUZELLE BLANCHE BARBUE	FRA
7085	TURDA-81-77	ROM
7092	TYLER	USA
7117	US(59)34	USA
7166	US(62)P66	COL
7279	VALDOR	FRA
7490	VPM V1-1-2-4R2-3-8-3-2	FRA
7585	WATTINES	FRA
7848	RONGOTEA	AUS-NZL
7973	BORDEAUX 113	FRA
7988	CREPIN A	FRA
8011	INSTITUT 1802	FRA
8048	RALET	FRA
8051	BLE BARBU DE MUROL	FRA
8058	ZANDA	BEL
8073	CORONATION	CAN
8079	KITCHENER	CAN
8165	NAVARRO150-ESP	ESP
8170	WS-13 CARDENO 34/45	ESP
8194	NEELKANT	SYR
8197	SANUNU	SYR
8227	NISHIKAZE KOMUGI	JPN
8254	CADENZA	FRA
8287	DC147U	FRA
8289	TM7MB1-1	FRA
9077	NON_PLUS_EXTRA	AUT
9087	PRINCE LEOPOLD	BEL
13210	SOLARIS	CZE
13282	ANATOLIE2	FRA
13292	CONCURRENT	FRA
13310	FRUH-WEIZEN	DEU
13445	VOLT	HUN
13461	BEHERT	FRA
13471	ORNICAR-FRA	FRA
13494	BELLOVAC	FRA
13502	PALIO	FRA
13792	CENTURK-USA	USA
14011	HANA	CZE
15606	BLE DE REDON BLANC BARBU	FRA
15658	BLE DE REDON BLANC 1/2 LACHE	FRA
15710	BLE DE REDON GLUMES VELUES	FRA
15950	AS68VM4-3-2/TJB636 13	FRA
15954	ASVM4/BEAUCHAMP 81B13	FRA
20074	MIRLEBEN	UKR
20224	FANTASIYA-ODESSKAYA	UKR
20276	EQUINOX	GBR-IRL
20384	DI9234-11-15-FRA	FRA
20417	HAMAC	NLD
24031	KRASNAYA	CAN
24058	SARI-BUGDA, GULGERI	CAUCASE
24066	CROISEMENT 268	CHE
24075	SPIN, 121-VAR,12/536	PAK
24089	TAU-BUGDA	CAUCASE
24108	ALBIDUM 12	RUS
24193	LANDRACE	CAUCASE
24196	ARABUGDASI	CAUCASE
24210	LAMMAS	GBR-IRL
